# Supplementary material for: The Activity and Specificity of the Outer Membrane Protein Chaperone SurA Are Modulated by a Proline Isomerase Domain
Source: PubMed Central journal article supplement — mBio. 2013 Aug 13;4(4):e00540-13. doi: 10.1128/mBio.00540-13 (PMC3747590; doi:10.1128/mbio.00540-13), 2013-08-13
Supplement: mbo004131594st2.pdf [file mbo004131594st2.pdf]

| Strain/<br>plasmid          | Genotype and relevant features                                                                                  | Reference                                                                                                                              |
|-----------------------------|-----------------------------------------------------------------------------------------------------------------|----------------------------------------------------------------------------------------------------------------------------------------|
| <i>E. coli</i> K-12 strains |                                                                                                                 |                                                                                                                                        |
| MC4100                      | F- <i>araD139 (argF-lac)U169 rpsL150 relA1 flb5301 deoC1 ptsF25 thi</i>                                         | (T.J. Silhavy, M.L. Berman, and L.W. Enquist, <i>Experiments with gene fusions</i> . 1984)                                             |
| JCM158                      | MC4100 <i>ara</i> <sup>-/-</sup>                                                                                | (J.C. Malinverni, J. Werner, S. Kim, J.G. Sklar, D. Kahne, R. Misra, and T.J. Silhavy, <i>Mol. Microbiol.</i> <b>61</b> :151–64, 2006) |
| JCM320                      | JCM158 $\Delta$ <i>bamA</i> $\Delta$ ( $\lambda$ <i>att-lom</i> )::bla P <sub>BAD</sub> <i>bamA</i> <i>araC</i> | (29)                                                                                                                                   |
| DPR437                      | JCM320 pZS21:: <i>bamA</i> <sup>+</sup>                                                                         | (D.P. Ricci, C.L. Hagan, D. Kahne, and T.J. Silhavy, <i>Proc. Natl. Acad. Sci. U. S. A.</i> <b>109</b> (9):3487-91, 2012)              |
| DPR439                      | DPR437 $\Delta$ <i>bamA</i>                                                                                     | (D.P. Ricci, C.L. Hagan, D. Kahne, and T.J. Silhavy, <i>Proc. Natl. Acad. Sci. U. S. A.</i> <b>109</b> (9):3487-91, 2012)              |
| DPR478                      | $\Delta$ <i>bamA</i> pZS21:: <i>bamA616 surA10 ara</i> ::cam                                                    | This study                                                                                                                             |
| DPR479                      | $\Delta$ <i>bamA</i> pZS21:: <i>bamA616 surA13 ara</i> ::cam                                                    | This study                                                                                                                             |
| DPR528                      | DPR439 <i>surA10</i>                                                                                            | This study                                                                                                                             |
| DPR529                      | DPR439 <i>surA13</i>                                                                                            | This study                                                                                                                             |
| DPR639                      | JCM158 <i>surA10</i>                                                                                            | This study                                                                                                                             |
| DPR640                      | JCM158 <i>surA13</i>                                                                                            | This study                                                                                                                             |
| DPR531                      | DPR439 <i>bamB8 yfhS</i> ::Tn10                                                                                 | This study                                                                                                                             |
| DPR542                      | $\Delta$ <i>bamA</i> pZS21:: <i>bamA</i> <sup>+</sup> pSurA                                                     | This study                                                                                                                             |
| DPR545                      | $\Delta$ <i>bamA</i> pZS21:: <i>bamA616</i> pSurA                                                               | This study                                                                                                                             |
| DPR549                      | $\Delta$ <i>bamA</i> pZS21:: <i>bamA616</i> pACYC177                                                            | This study                                                                                                                             |
| DPR546                      | $\Delta$ <i>bamA</i> pZS21:: <i>bamA616 surA10 araBAD</i> ::cam pSurA                                           | This study                                                                                                                             |
| DPR547                      | $\Delta$ <i>bamA</i> pZS21:: <i>bamA616 surA13 araBAD</i> ::cam pSurA                                           | This study                                                                                                                             |
| DPR587                      | $\Delta$ <i>bamA</i> pZS21:: <i>bamA</i> <sup>+</sup> <i>cpXR</i> ::spc                                         | This study                                                                                                                             |
| DPR588                      | $\Delta$ <i>bamA</i> pZS21:: <i>bamA616 cpXR</i> ::spc                                                          | This study                                                                                                                             |
| DPR589                      | $\Delta$ <i>bamA</i> pZS21:: <i>bamA616 surA10 cpXR</i> ::spc                                                   | This study                                                                                                                             |
| DPR590                      | $\Delta$ <i>bamA</i> pZS21:: <i>bamA616 surA13 cpXR</i> ::spc                                                   | This study                                                                                                                             |
| DPR602                      | DPR528 <i>bamB</i> ::kan <i>xyz</i> ::cam                                                                       | This study                                                                                                                             |
| DPR603                      | DPR529 <i>bamB</i> ::kan <i>xyz</i> ::cam                                                                       | This study                                                                                                                             |

|         |                                                                                           |                                                                                                                    |
|---------|-------------------------------------------------------------------------------------------|--------------------------------------------------------------------------------------------------------------------|
| DPR641  | JCM158 <i>surA10 bamB::kan</i>                                                            | This study                                                                                                         |
| DPR642  | JCM158 <i>surA13 bamB::kan</i>                                                            | This study                                                                                                         |
| DPR638  | DPR478 <i>cpxA24 zii::Tn10</i> $\Phi\lambda$ [ <i>spy::lacZ</i> ]                         | This study                                                                                                         |
| DPR647  | DPR439 $\Phi\lambda$ [ <i>rpoHP3::'lacZ</i> ]                                             | This study                                                                                                         |
| DPR648  | $\Delta$ <i>bamA</i> pZS21:: <i>bamA616</i> $\Phi\lambda$ [ <i>rpoHP3::'lacZ</i> ]        | This study                                                                                                         |
| DPR649  | $\Delta$ <i>bamA</i> pZS21:: <i>bamA616 surA10</i> $\Phi\lambda$ [ <i>rpoHP3::'lacZ</i> ] | This study                                                                                                         |
| DPR650  | $\Delta$ <i>bamA</i> pZS21:: <i>bamA616 surA13</i> $\Phi\lambda$ [ <i>rpoHP3::'lacZ</i> ] | This study                                                                                                         |
| JAS610  | MC4100 $\Delta$ <i>araBAD</i> $\Delta$ <i>surA</i> pSurA <sup>AP1</sup>                   | This study                                                                                                         |
| JAS365  | MC4100 $\Delta$ <i>araBAD</i> $\Delta$ <i>surA</i> pSurA <sup>AP2</sup>                   | This study                                                                                                         |
| JAS377  | MC4100 $\Delta$ <i>araBAD</i> $\Delta$ <i>surA</i> pSurA <sup>S220A</sup>                 | This study                                                                                                         |
| DPR768  | $\Delta$ <i>bamA</i> pZS21:: <i>bamA616</i> pSurA <sup>S220A</sup>                        | This study                                                                                                         |
| DPR880  | $\Delta$ <i>bamA</i> pZS21:: <i>bamA616</i> pSurA <sup><math>\Delta</math>217-222</sup>   | This study                                                                                                         |
| DPR821  | JCM158 pHis-BamA                                                                          | (D.P. Ricci, C.L. Hagan, D. Kahne, and T.J. Silhavy, Proc. Natl. Acad. Sci. U. S. A. <b>109</b> (9):3487-91, 2012) |
| DPR720  | JCM158 pHis-BamA <sup>616</sup>                                                           | This study                                                                                                         |
| DPR748  | JCM158 <i>surA10</i> pHis-BamA                                                            | This study                                                                                                         |
| DPR721  | JCM158 <i>surA10</i> pHis-BamA <sup>616</sup>                                             | This study                                                                                                         |
| DPR1270 | JCM158 <i>bamB::kan</i> pHis-BamA                                                         | This study                                                                                                         |

### Plasmids

|                                             |                                                                                |                                                                        |
|---------------------------------------------|--------------------------------------------------------------------------------|------------------------------------------------------------------------|
| pZS21                                       | Low-copy vector; $\lambda$ P <sub>L</sub> -driven expression, Kan <sup>r</sup> | (R. Lutz and H. Bujard, Nucleic Acids Res. <b>25</b> :1203–10, 1997)   |
| pBamA                                       | pZS21:: <i>bamA</i> <sup>+</sup>                                               | (30)                                                                   |
| pBamA <sup>616</sup>                        | pZS21:: <i>bamA616</i>                                                         | This study                                                             |
| pHis-BamA                                   | pET22-42::His <sub>6</sub> - <i>bamA</i>                                       | (28)                                                                   |
| pHis-BamA <sup>616</sup>                    | pET22-42::His <sub>6</sub> - <i>bamA616</i>                                    | This study                                                             |
| pACYC177                                    | Low-copy vector; Amp <sup>r</sup> , Kan <sup>r</sup>                           | (A.C. Chang and S.N. Cohen, J. Bacteriol. <b>134</b> :1141–1156, 1978) |
| pSurA                                       | pACYC177::P <sub>BAD</sub> - <i>surA</i> <sup>+</sup> (pAER1)                  | (8)                                                                    |
| pSurA <sup>S220A</sup>                      | pACYC177::P <sub>BAD</sub> - <i>surAS220A</i>                                  | This study                                                             |
| pSurA <sup>AP1</sup>                        | pACYC177::P <sub>BAD</sub> - <i>surA</i> $\Delta$ P1                           | This study                                                             |
| pSurA <sup>AP2</sup>                        | pACYC177::P <sub>BAD</sub> - <i>surA</i> $\Delta$ P2                           | (14)                                                                   |
| pSurA <sup><math>\Delta</math>217-222</sup> | pACYC177::P <sub>BAD</sub> - <i>surA</i> $\Delta$ 217-222                      | This study                                                             |
