# Supplementary figures and images for: The Activity and Specificity of the Outer Membrane Protein Chaperone SurA Are Modulated by a Proline Isomerase Domain
Source: PubMed Central journal article supplement — mBio. 2013 Aug 13;4(4):e00540-13. doi: 10.1128/mBio.00540-13 (PMC3747590; doi:10.1128/mbio.00540-13), 2013-08-13

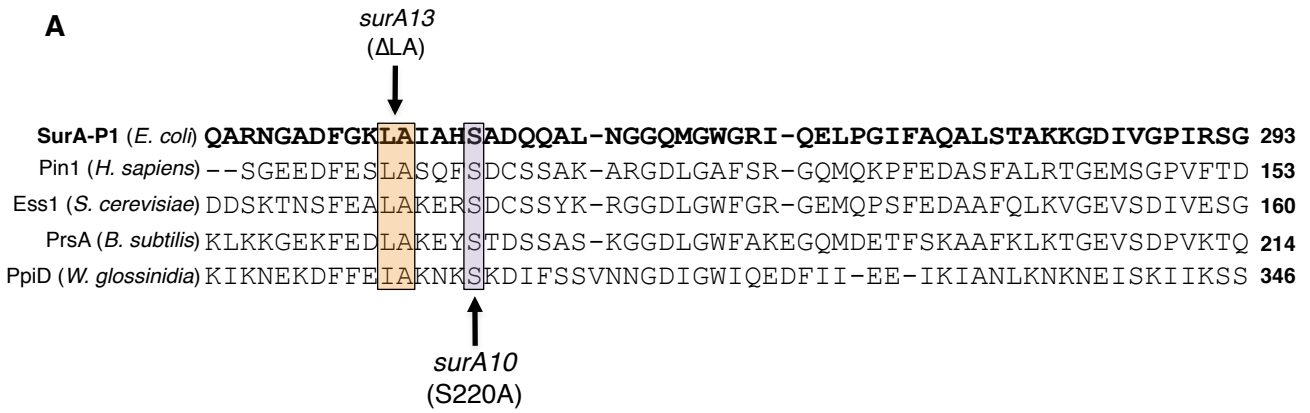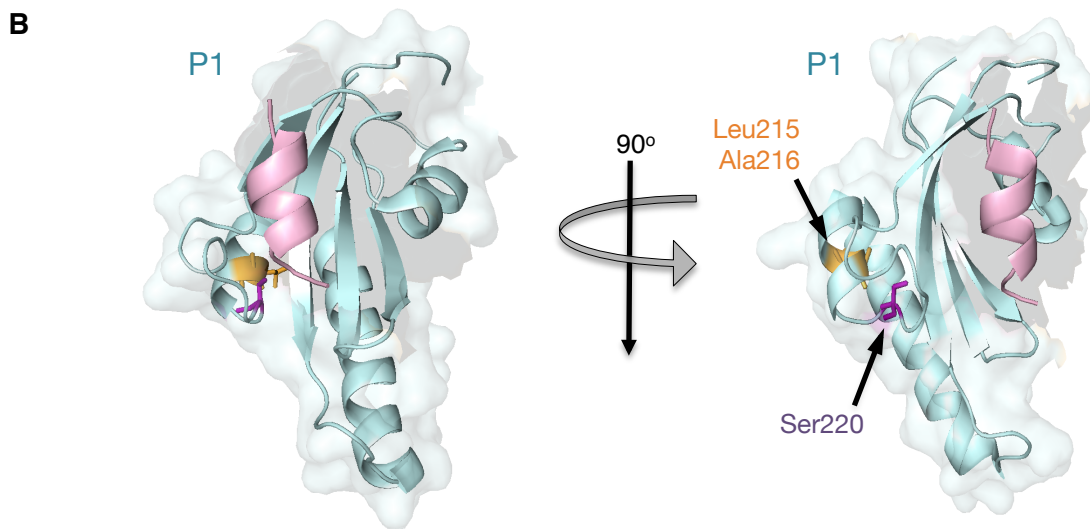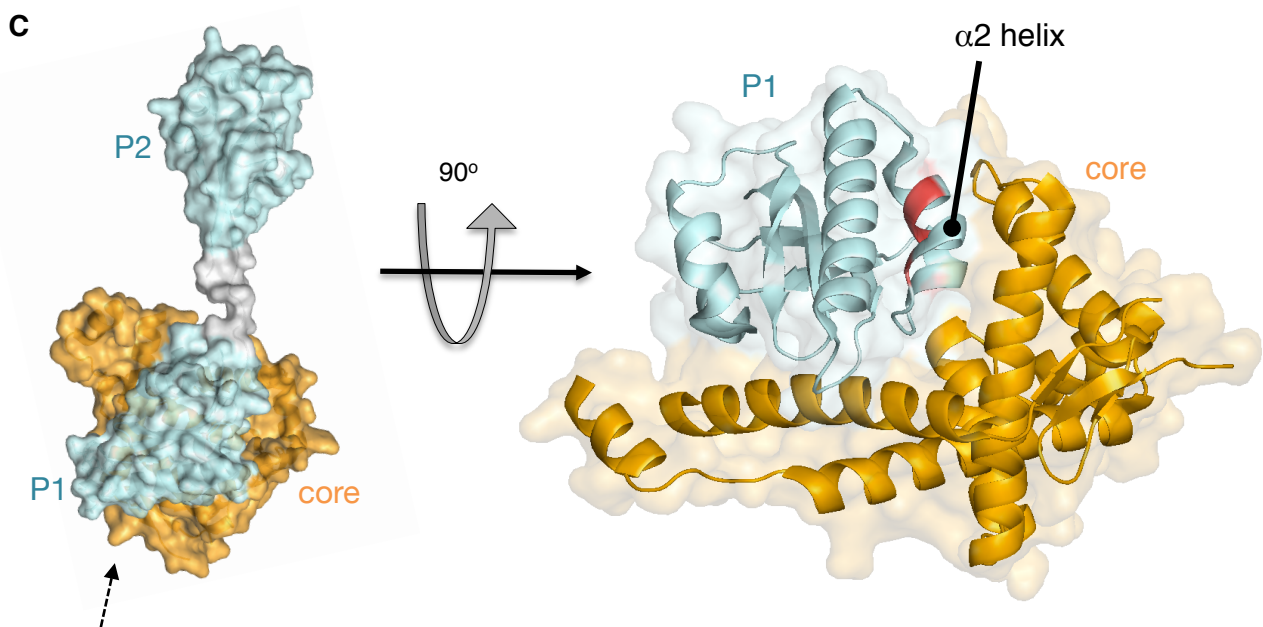

Supplement: mbo004131594sf04.pdf [file mbo004131594sf04.pdf]

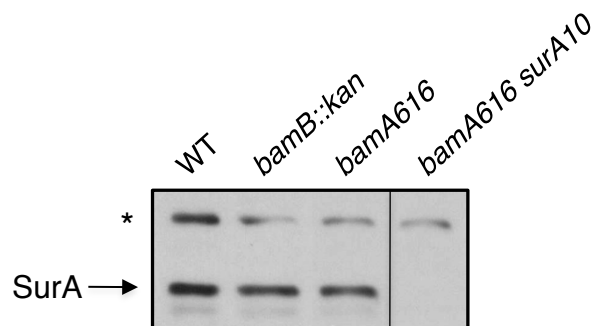

Supplement: mbo004131594sf05.pdf [file mbo004131594sf05.pdf]
